# Supplementary material for: Tuning the reactivity of a dissociative force field: proton transfer properties of aqueous H3O+and their dependence on the three-body interaction
Source: Royal Society of Chemistry journal article supplement (doi:10.1039/c4cp05607h), 2015-01-01
Supplement: c4cp05607h1.pdf [file c4cp05607h1.pdf]

**Tuning the reactivity of a dissociative  
force field: proton transfer properties of  
aqueous  $\text{H}_3\text{O}^+$  and their dependence on  
the three-body interaction –  
Supplementary Information.**

*Martin J. Wiedemair, Manuel Hitzenberger and  
Thomas S. Hofer\**

Theoretical Chemistry Division  
Institute of General, Inorganic and Theoretical Chemistry  
University of Innsbruck, Innrain 80-82, 6020 Innsbruck, Austria  
E-Mail: t.hofer@uibk.ac.at  
Tel.: +43-512-507-57111  
Fax: +43-512-507-57199

October 10, 2014

---

\*Corresponding author

## Supplementary Information

In the Results section of our article the influence of the second derivative of the screening function with respect to the pair distance  $\mathbf{r}_{ij}$  is discussed. Equations S1 to S3 show the screening function  $f_{scr}$  and its first and second derivatives.

$$f_{scr} = e^{\frac{\gamma_{ij}}{\|\mathbf{r}_{ij}\| - r_{ij}^0}} \quad (\text{S1})$$

$$\frac{\partial f_{scr}}{\partial \mathbf{r}_i} = - \frac{\gamma_{ij}}{(\|\mathbf{r}_{ij}\| - r_{ij}^0)^2} e^{\frac{\gamma_{ij}}{\|\mathbf{r}_{ij}\| - r_{ij}^0}} \quad (\text{S2})$$

$$\frac{\partial^2 f_{scr}}{\partial \mathbf{r}_i^2} = \frac{\gamma_{ij}}{(\|\mathbf{r}_{ij}\| - r_{ij}^0)^3} \left( 2 + \frac{\gamma_{ij}}{\|\mathbf{r}_{ij}\| - r_{ij}^0} \right) e^{\frac{\gamma_{ij}}{\|\mathbf{r}_{ij}\| - r_{ij}^0}} \quad (\text{S3})$$

Figure S1 depicts the screening function and the second derivative as a function of the pair distance  $\mathbf{r}_{ij}$ . The slightly lowered curvature of set A (red) compared to the original parameter set C (black) is clearly visible.

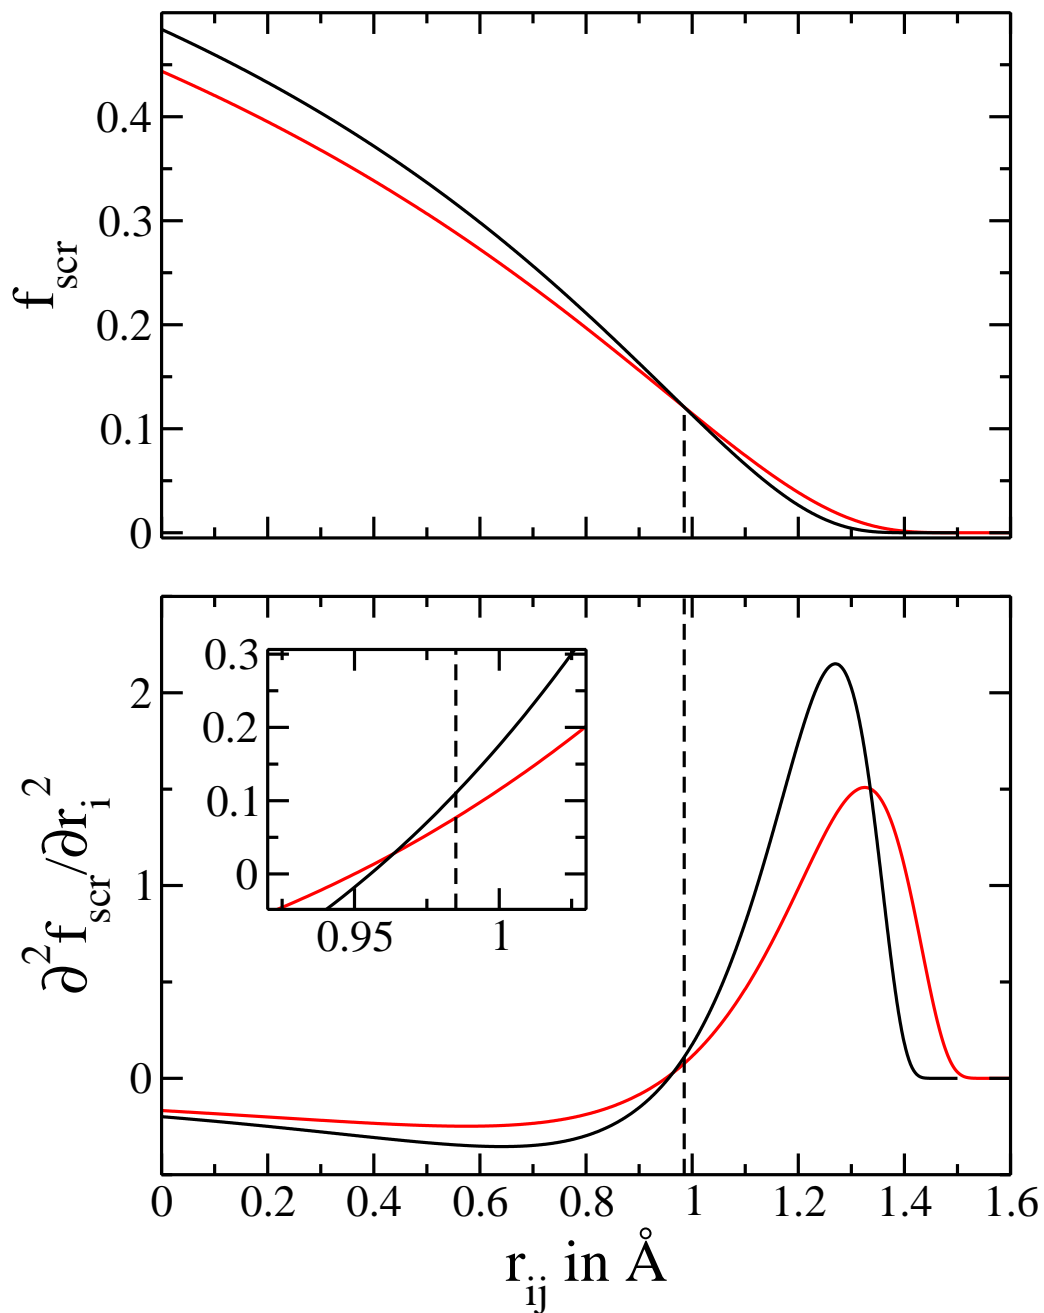

Figure S1: Screening function  $f_{scr}$  (top) and its second derivative (bottom) as a function of the pair distance  $r_{ij}$ . The curvature obtained for the newly developed parameter set A (red) is smaller compared to the original parametrization of the model set C (black) at the average value of the OH distance being  $0.985\text{\AA}$ .
